# Supplementary material for: The Association of Waist Circumference with the Prevalence and Survival of Digestive Tract Cancer in US Adults: A Population Study Based on Machine Learning Methods
Source: Hindawi journal article supplement (doi:10.1155/2022/2492488), 2022-10-06

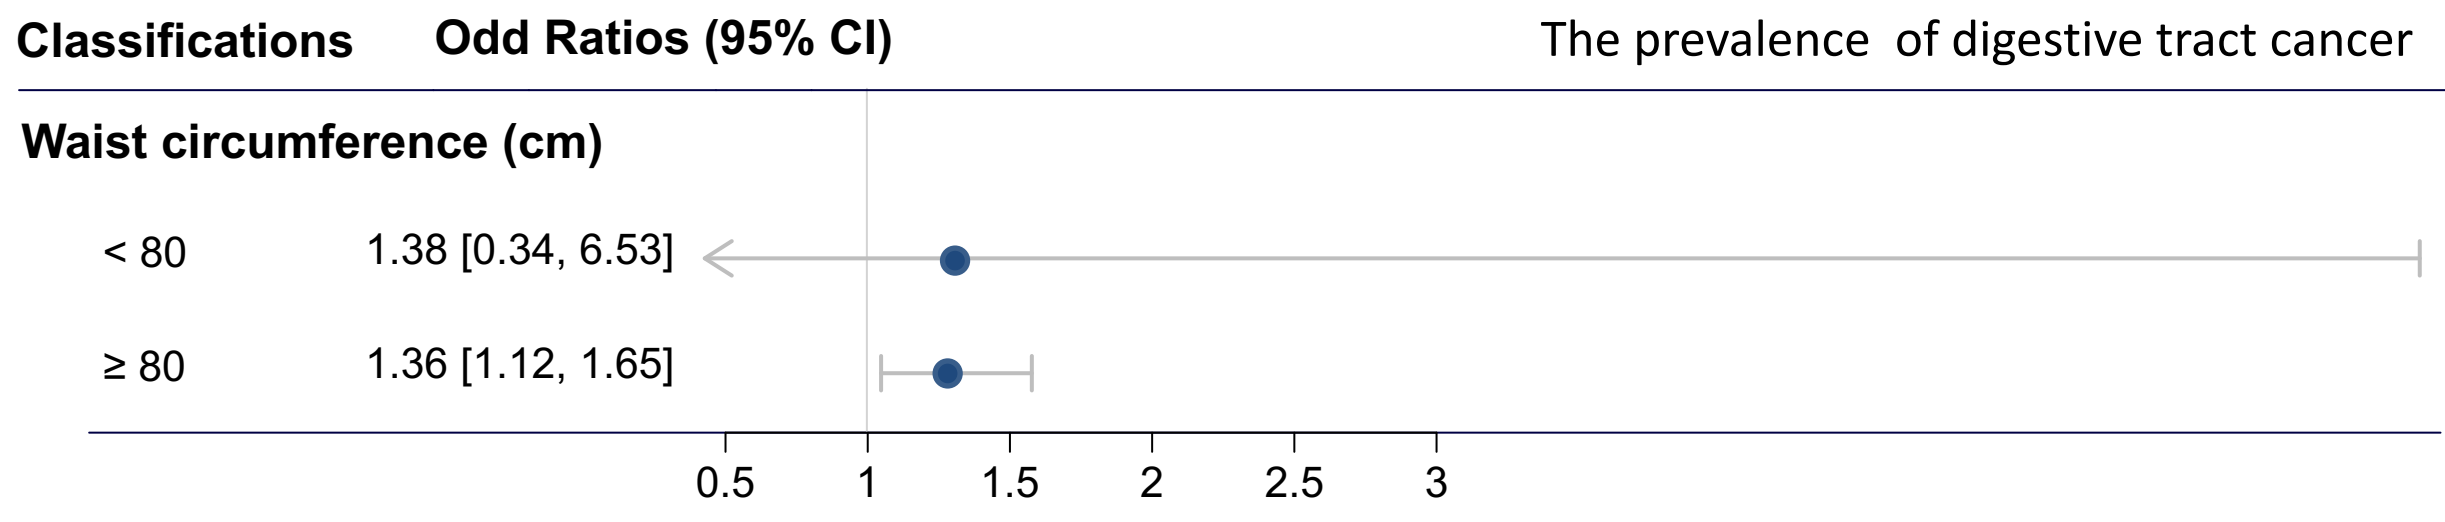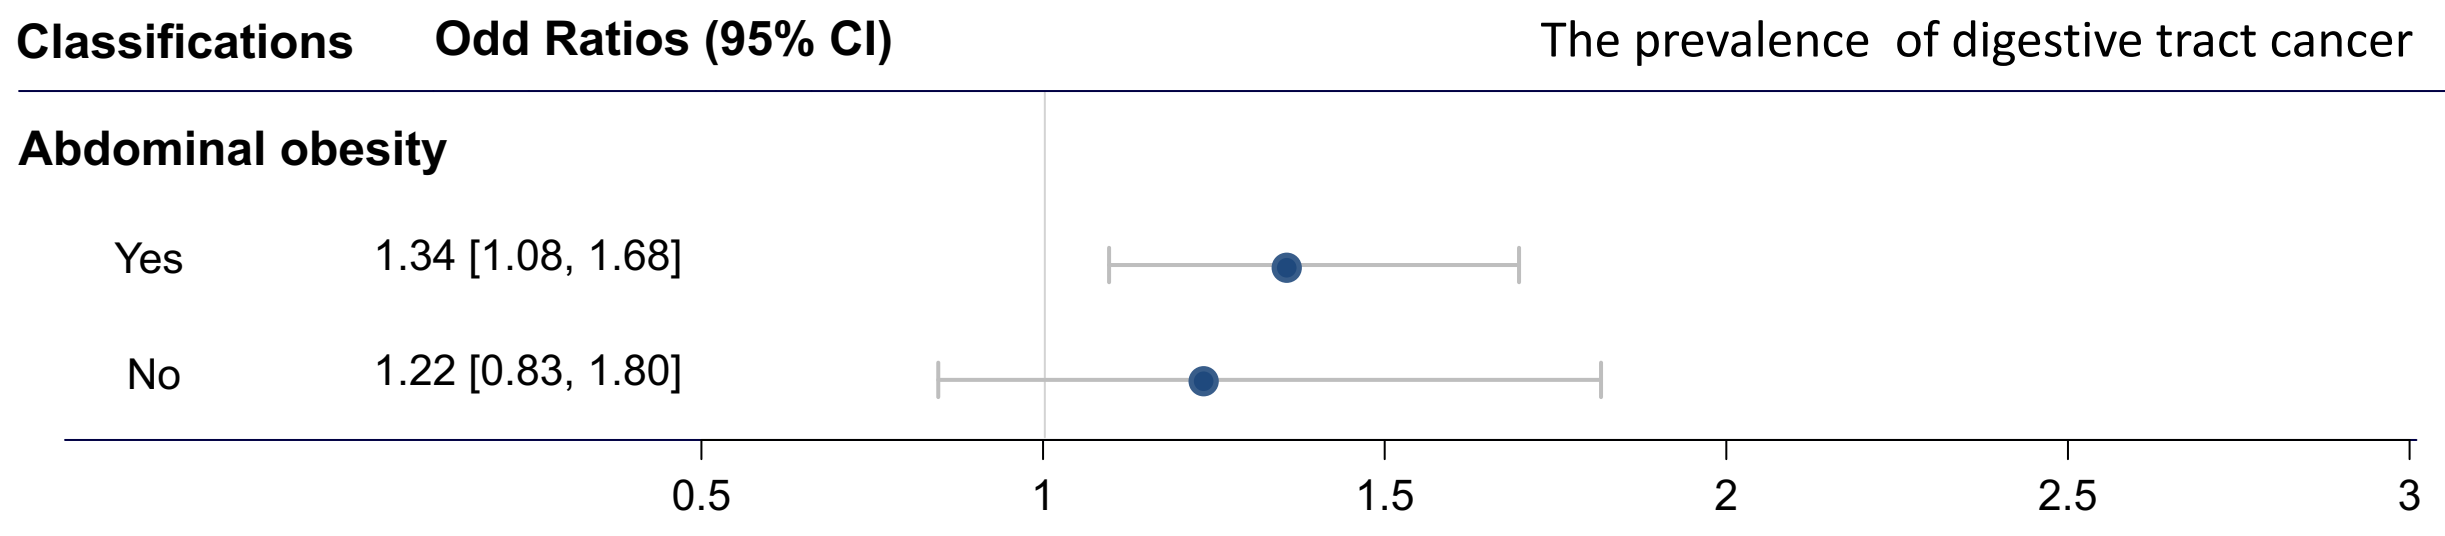

Supplement: f1 [file 2492488.f1.pdf]
